# Supplementary material
Source: PubMed Central journal article supplement (PMC3070583)
Supplement: mmc1.pdf [file mmc1.pdf]

## Supplemental Material

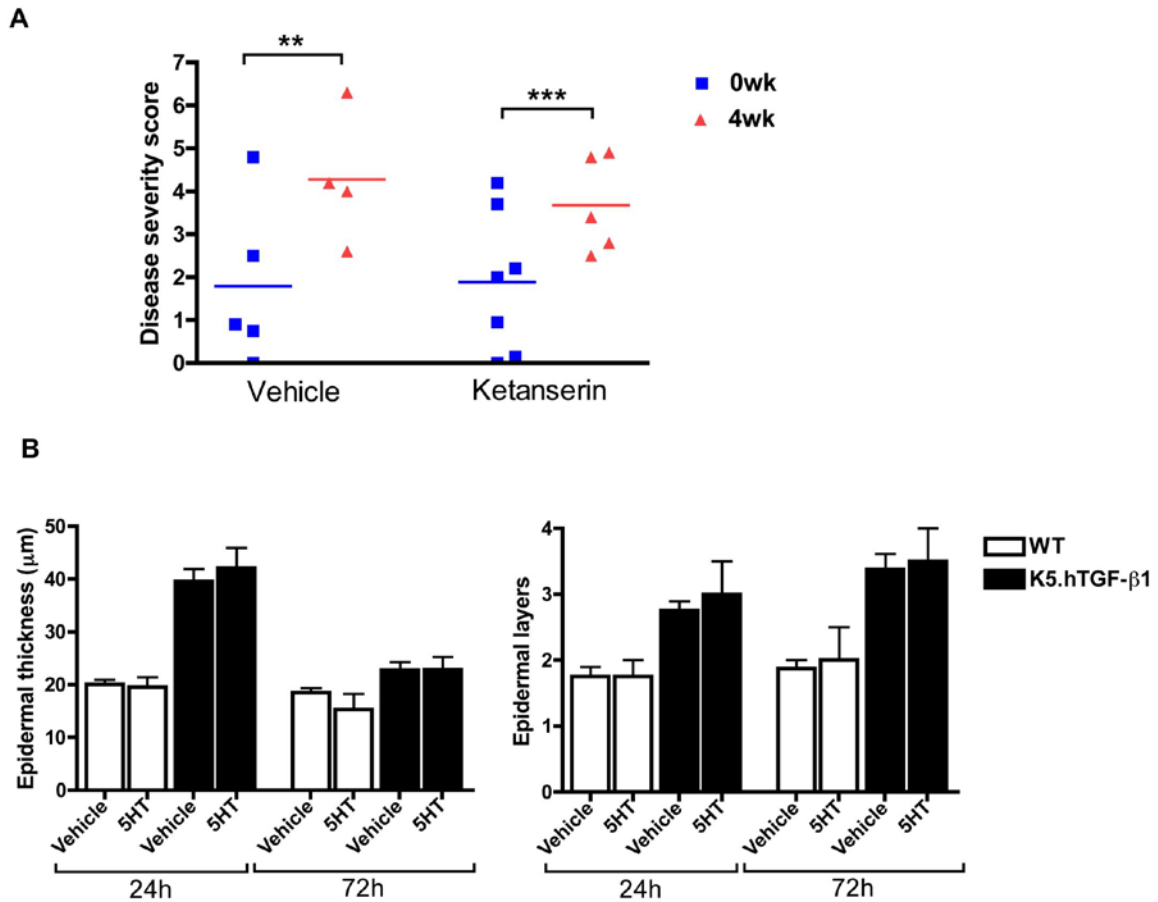

## Supplemental Figure S1

**(A)** K5.hTGF- $\beta$ 1 transgenic mice were injected i.p. twice weekly for 4 weeks with serotonin receptor antagonist ketanserin tartrate (10mg/kg) or its vehicle. A specific score (ranging from 0 to a maximum of 9) was used to monitor macroscopic disease severity score, as described in material and methods. Note the disease score significantly increased over the 4-week treatment period in both treatment groups. There was no significant difference in the treatment score at week 0 and week 4 between the two treatment groups. **(B)** Mice were injected intradermally on abdominal skin with 5-HT (5  $\mu$ g) or with vehicle control. Biopsies were taken at injection sites at different time points after injection (24h and 72h) for histological evaluation, as defined in materials and methods (n=2-5 per treatment and time point). Note there was no significant difference in epidermal thickness and epidermal layers between vehicle and 5-HT treatment at 24h and 72 h.
