# Supplementary material
Source: PubMed Central journal article supplement (PMC3070583)
Supplement: mmc2.pdf [file mmc2.pdf]

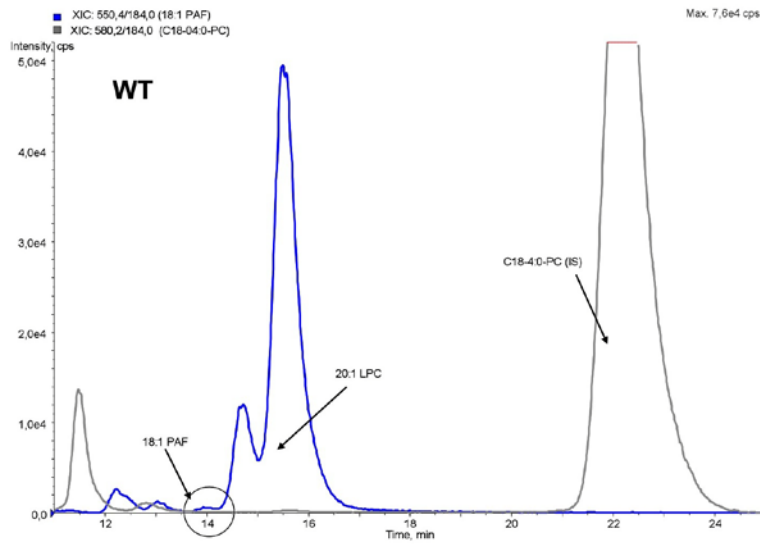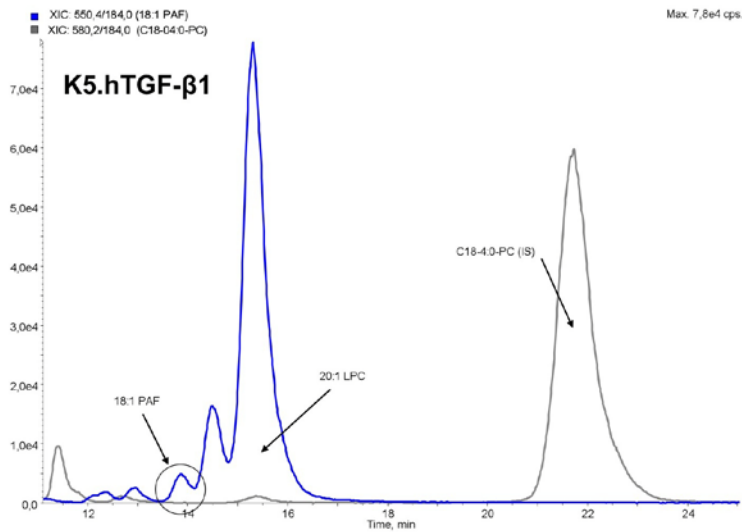

## Supplemental Figure S2

Representative single reaction monitoring chromatogram from LC-MS/MS analysis of a sample from an individual wild type mouse (WT, upper graphic) or K5.hTGFβ1 transgenic mouse (lower graphic). The extracted mass traces reflect PAF 18:1, lysophosphatidylcholine 20:1 and the internal standard C18:0-4:0 PC.
